# Supplementary material
Source: ML conference proceedings conference paper supplement (https://openreview.net/forum?id=32c8pl84_uD)
Supplement: supplementary_material [file attachment]

## 10 Appendix

### 10.1 Case Studies

As a common issue in MIS, the general estimators are usually difficult to optimize due to the mini-max form. One solution is to choose the discriminator class ( $\mathcal{Q}$  in our case) to be an RKHS, which often leads to a closed-form solution to the inner max and reduces the minimax optimization to a single minimization problem [16, 18, 26]. Below we show that this is also the case for our estimator, and provide the closed-form expression for the inner maximization when  $\mathcal{Q}$  is an RKHS.

**Lemma 10.1.** *Let  $\langle \cdot, \cdot \rangle_{\mathcal{H}_K}$  be the inner-product of  $\mathcal{H}_K$  which satisfies the Reproducible Kernel Hilbert Space (RKHS) property. When the function space  $\mathcal{Q} = \{q : \mathcal{S} \times \mathcal{A} \rightarrow \mathbb{R}; \langle q, q \rangle_{\mathcal{H}_K} \leq 1\}$ , the term  $\max_{q \in \mathcal{Q}} L_w(w, \beta, q)^2$  has the following closed-form expression:*

$$\begin{aligned} & \mathbb{E}_{\substack{(s,a,s') \sim \mu \\ (\tilde{s}, \tilde{a}, \tilde{s}') \sim \mu}} [w(s, a) \cdot w(\tilde{s}, \tilde{a}) \cdot \beta(s, a) \cdot \beta(\tilde{s}, \tilde{a}) \cdot (K((s, a), (\tilde{s}, \tilde{a})) - 2\gamma \mathbb{E}_{a' \sim \pi(\cdot|s')} [K((s', a'), (\tilde{s}, \tilde{a}))]) \\ & + \gamma^2 \mathbb{E}_{\substack{a' \sim \pi(\cdot|s') \\ \tilde{a}' \sim \pi(\cdot|\tilde{s}')}} [K((s', a'), (\tilde{s}', \tilde{a}')))] - 2(1 - \gamma) \mathbb{E}_{\substack{(s,a,s') \sim \mu \\ \tilde{s} \sim d_0, \tilde{a} \sim \pi(\cdot|\tilde{s})}} [w(s, a) \cdot \beta(s, a) \cdot (K((s, a), (\tilde{s}, \tilde{a})) \\ & - \gamma \mathbb{E}_{a' \sim \pi(\cdot|s')} [K((s', a'), (\tilde{s}, \tilde{a}))]) + (1 - \gamma)^2 \mathbb{E}_{\substack{s \sim d_0, a \sim \pi(\cdot|s) \\ \tilde{s} \sim d_0, \tilde{a} \sim \pi(\cdot|\tilde{s})}} [K((s, a), (\tilde{s}, \tilde{a}))]. \end{aligned}$$

Furthermore, when we use linear functions to approximate both  $w$  and  $q$ , the final estimator has a closed-form solution

**Lemma 10.2.** *Consider linear parameterization  $w(s, a) = \phi(s, a)^T \alpha$ , where  $\phi \in \mathbb{R}^d$  is a feature map in  $\mathbb{R}^d$  and  $\alpha$  is the linear coefficients. Similarly let  $q(s, a) = \Psi(s, a)^T \zeta$  where  $\Psi \in \mathbb{R}^d$ . Then, assuming that we have an estimate of  $\frac{d_{P_{tr}}}{\mu}$  as  $\hat{\beta}$ , we can empirically estimate  $\hat{w}$  using Equation 8, which has a closed-form expression  $\hat{w}(s, a) = \phi(s, a)^T \hat{\alpha}$ , where*

$$\hat{\alpha} = (\mathbb{E}_{n, (s,a,s') \sim \mu} [(\Psi(s, a) - \gamma \Psi(s', \pi)) \cdot \phi(s, a)^T \cdot \hat{\beta}(s, a)])^{-1} (1 - \gamma) \mathbb{E}_{n, s \sim d_0} [\Psi(s, \pi)] \quad (10)$$

provided that the matrix being inverted is non-singular. Here,  $\mathbb{E}_n$  is the empirical expectation using  $n$ -samples.

Detailed proof for these Lemma can be found in section 10.4 and 10.5 respectively.

### 10.2 Q-Function Estimator

In this section, we show an extension of our idea that can approximate the Q-function in the target environment. Similar to we did in the previous section, we now consider the OPE error of a candidate function  $q$ , that is,  $|(1 - \gamma) \mathbb{E}_{s \sim d_0} [q(s, \pi)] - J(\pi)|$ , under the assumption that  $w_{P_{te}/P_{tr}} \in \text{conv}(\mathcal{W})$ :

$$\begin{aligned} & |(1 - \gamma) \mathbb{E}_{s \sim d_0} [q(s, \pi)] - J_{P_{te}}(\pi)| = |\mathbb{E}_{\substack{(s,a) \sim d_{P_{te}}^\pi, \\ r \sim R(s,a), s' \sim P(s,a)}} [q(s, a) - \gamma q(s', \pi)] - \mathbb{E}_{\substack{(s,a) \sim d_{P_{tr}}^\pi, \\ r \sim R(s,a)}} [W_{P_{te}/P_{tr}} \cdot r]| \\ & = |\mathbb{E}_{\substack{(s,a) \sim \mu, \\ r \sim R(s,a), s' \sim P(s,a)}} [W_{P_{te}/P_{tr}} \cdot \beta \cdot (q(s, a) - \gamma q(s', \pi))] - \mathbb{E}_{\substack{(s,a) \sim d_{P_{tr}}^\pi, \\ r \sim R(s,a)}} [W_{P_{te}/P_{tr}} \cdot r]| \\ & \leq \sup_{w \in \mathcal{W}} |\mathbb{E}_{\substack{(s,a) \sim \mu, \\ r \sim R(s,a), s' \sim P(s,a)}} [w \cdot \beta \cdot (q(s, a) - \gamma q(s', \pi))] - \mathbb{E}_{\substack{(s,a) \sim d_{P_{tr}}^\pi, \\ r \sim R(s,a)}} [w \cdot r]| \\ & =: \sup_{w \in \mathcal{W}} L_q(w, \beta, q). \end{aligned} \quad (11)$$

The inequality step uses the assumption that  $w_{P_{te}/P_{tr}} \in \text{conv}(\mathcal{W})$ , and the final expression is a valid upper bound on the error of using  $q$  for estimating  $J_{P_{te}}(\pi)$ . It is also easy to see that the bound is tight because  $q = Q_{P_{te}}^\pi$  satisfies the Bellman equation on all state-action pairs, and hence  $L_q(w, \beta, Q_{P_{te}}^\pi) \equiv 0$ .

360 Using this derivation, we propose the following estimator which will estimate  $Q_{P_{te}}^\pi$ .

$$Q_{P_{te}}^\pi \approx \hat{q} := \arg \min_{q \in \mathcal{Q}} \max_{w \in \mathcal{W}} L_q(w, \beta, q). \quad (12)$$

361 Below we provide the results that parallel Lemmas 10.1 and 10.2 for the Q-function estimator.

362 **Lemma 10.3.** *Let  $\langle \cdot, \cdot \rangle_{\mathcal{H}_K}$  be the inner-product of  $\mathcal{H}_K$  which satisfies the Reproducible Kernel*  
 363 *Hilbert Space (RKHS) property. When the function space  $\mathcal{W} = \{w : \mathcal{S} \times \mathcal{A} \rightarrow \mathbb{R} | \langle w, w \rangle_{\mathcal{H}_K} \leq 1\}$ .*  
 364 *The term  $\max_{w \in \mathcal{W}} L_q(w, \beta, q)^2$  has a closed form expression.*

365 We defer the detailed expression and its proof to Appendix 10.6.

366 **Lemma 10.4.** *Let  $w = \phi(s, a)^T \alpha$  where  $\phi \in \mathbb{R}^d$  is some basis function. Let  $q(s, a) = \Psi(s, a)^T \zeta$ ,*  
 367 *where  $\Psi(s, a) \in \mathbb{R}^d$ . Then, assuming that we have an estimate of  $\frac{d_{P_{tr}}^\pi}{\mu}$  as  $\hat{\beta}$ , we can empirically*  
 368 *estimate  $\hat{q}$  using uniqueness condition similar to Equation 12, which has a closed-form expression*  
 369  *$\hat{w}(s, a) = \Psi(s, a)^T \hat{\zeta}$ , where*

$$\hat{\zeta} = (\mathbb{E}_{n, \mu}^\pi [\hat{\beta} \cdot (\Phi(s, a) \Psi(s, a)^T - \gamma \Phi(s, a) \Psi(s', \pi))])^{-1} \mathbb{E}_{n, (s, a) \sim d_{P_{tr}}^\pi, r \sim R(s, a)} [\Phi(s, a) \cdot r] \quad (13)$$

370 where,  $\mathbb{E}_n$  is the empirical expectation calculated over  $n$ -samples and assuming that the provided  
 371 matrix is non-singular.

372 **Theorem 10.5.** *Let  $\hat{\beta}$  be our estimation of  $\beta$  using [20]. We utilize this  $\hat{\beta}$  to further optimize for*  
 373  *$\hat{w}_n$  (equation 8) using  $n$  samples. In both cases,  $\mathbb{E}_{(s, a) \sim d_{P_{tr}}^\pi} [\cdot]$  is also approximated with  $n$  samples*  
 374 *from the simulator  $P_{tr}$ . Then, under Assumptions 1 and 2 along with the additional assumption that*  
 375  *$Q_{P_{te}}^\pi \in C(\mathcal{Q})$  with probability at least  $1 - \delta$ , We can guarantee the OPE error for  $\hat{q}_n$  which was*  
 376 *optimized using equation 12 on  $n$  samples.*

$$\begin{aligned} & |(1 - \gamma) \mathbb{E}_{d_0} [\hat{q}_n(s, \pi)] - J_P(\pi)| \leq \\ & \min_{q \in \mathcal{Q}} \max_{w \in \mathcal{W}} L_q(w, \beta, q) + 4\mathcal{R}_n(\mathcal{W}, \mathcal{Q}) + 2C_W \frac{R_{max}}{1 - \gamma} \sqrt{\frac{\log(\frac{2}{\delta})}{2n}} \\ & + C_W \frac{R_{max}}{1 - \gamma} \cdot \tilde{O} \left( \sqrt{\left\| \frac{d_{P_{tr}}^\pi}{\mu} \right\|_\infty \left( 4\mathbb{E}\mathcal{R}_n(\mathcal{F}) + C_{\mathcal{F}} \sqrt{\frac{2 \log(\frac{2}{\delta})}{n}} \right)} \right) \end{aligned}$$

377 where  $\mathcal{R}_n(\mathcal{F}), \mathcal{R}_n(\mathcal{W}, \mathcal{Q})$  are the Radamacher complexities of function classes  $\{(x, y) \rightarrow f(x) -$   
 378  $\log(f(y)) : f \in \mathcal{F}\}$  and  $\{(s, a, s') \rightarrow (w(s, a) \cdot \frac{d_{P'}^\pi(s, a)}{\mu(s, a)} \cdot (q(s, a) - \gamma q(s', \pi)) : w \in \mathcal{W}, q \in \mathcal{Q}\}$ ,  
 379 respectively,  $\|d_{P'}^\pi / \mu\|_\infty := \max_{s, a} d_{P'}^\pi(s, a) / \mu(s, a)$  measures the distribution shift between  $d_{P'}^\pi$ ,  
 380 and  $\mu$ , and  $\tilde{O}(\cdot)$  is the big-Oh notation suppressing logarithmic factors. Under the assumption  
 381  $w_{P_{tr}/P_{te}}^\pi \in C(\mathcal{W})$ ,

### 382 10.3 Derivation for $\beta$ -GradientDICE

383 We will show a demonstration on finite state-action space. The following identity holds true for  
 384  $\tau_* = \frac{d_{P_{te}}^\pi}{d_{P_{tr}}^\pi}$ . Let us assume that we have the diagonal matrix  $D$  with diagonal elements being  $d_{P_{tr}}^\pi$ .  
 385 The following identity holds true.

$$D\tau_* = \mathcal{T}\tau_* \quad (14)$$

386 Where,  $d_0(s, a) = d_0(s)\pi(a|s)$  and  $\mathcal{T}$  is the reverse bellman operator

$$\mathcal{T}y = (1 - \gamma)d_0(s, a) + \gamma P_\pi^T Dy$$

387 Where,  $P_\pi((s, a), (s', a')) = P_{te}(s'|s, a)\pi(a'|s')$  To estimate  $\tau$ , we can simply run the following  
 388 optimization

$$\tau := \arg \min_{\tau : \mathcal{S} \times \mathcal{A} \rightarrow \mathbb{R}} |D\tau - \mathcal{T}\tau|_{D^{-1}}^2 + \frac{\lambda}{2} ((d_{P_{tr}}^\pi)^T \tau - 1)$$

Here,  $|y|_\Sigma^2 = y^T \Sigma y$ . The optimization above can be simplified in form of expectation over  $d_{P_{tr}}^\pi$ .

$$\mathbb{E}_{(s,a) \sim d_{P_{tr}}^\pi} \left[ \left( \frac{\delta(s,a)}{d_{tr}^\pi(s,a)} \right)^2 \right] + \frac{\lambda}{2} ((d_{P_{tr}}^\pi)^T \tau - 1)$$

With,  $\delta(s,a) = D\tau - \tau$ , We can now apply Fenchel Conjugate principle to get the following

$$\max_{f: S \times A \rightarrow \mathbb{R}} \mathbb{E}_{(s,a) \sim d_{P_{tr}}^\pi} \left[ \frac{\delta(s,a)}{d_{tr}^\pi} f(s,a) - \frac{1}{2} f(s,a)^2 \right] + \max_{\eta \in \mathbb{R}} (\mathbb{E}_{d_{P_{tr}}^\pi} [\eta \tau(s,a) - \eta] - \frac{\eta^2}{2})$$

If we simplify the above optimization, we get the following form

$$\begin{aligned} \frac{d_{P_{te}}^\pi}{d_{P_{tr}}^\pi} &:= \arg \min_{\tau: S \times A \rightarrow \mathbb{R}} \max_{f: S \times A \rightarrow \mathbb{R}, \eta \in \mathbb{R}} L(\tau, \eta, f) \\ &= (1 - \gamma) \mathbb{E}_{s_0 \sim d_0, a_0 \sim \pi(\cdot|s_0)} [f(s_0, a_0)] + \gamma \mathbb{E}_{(s,a) \sim d_{P_{tr}}^\pi} [\tau(s,a) f(s', a')] \\ &\quad - \mathbb{E}_{(s,a) \sim d_{P_{tr}}^\pi} [\tau(s,a) f(s,a)] - \frac{1}{2} \mathbb{E}_{(s,a) \sim d_{P_{tr}}^\pi} [f(s,a)^2] + \lambda \mathbb{E}_{(s,a) \sim d_{P_{tr}}^\pi} [\eta \tau(s,a) - \eta^2/2]. \end{aligned}$$

While we don't have samples from  $(s, a, s') \sim d_{P_{tr}}^\pi$ . We can simply re-weight the term

$\mathbb{E}_{(s,a) \sim d_{P_{tr}}^\pi} [\tau(s,a) f(s', a')]$  with  $\beta(s,a) = \frac{d_{P_{tr}}^\pi}{\mu}$ . This completes the derivation of  $\beta$ -

GradientDICE.

$$\begin{aligned} \frac{d_{P_{te}}^\pi}{d_{P_{tr}}^\pi} &:= \arg \min_{\tau: S \times A \rightarrow \mathbb{R}} \max_{f: S \times A \rightarrow \mathbb{R}, \eta \in \mathbb{R}} L(\tau, \eta, f) \\ &= (1 - \gamma) \mathbb{E}_{s_0 \sim d_0, a_0 \sim \pi(\cdot|s_0)} [f(s_0, a_0)] + \gamma \mathbb{E}_{(s,a,s') \sim \mu, a' \sim \pi(\cdot|s')} [\beta(s,a) \tau(s,a) f(s', a')] \\ &\quad - \mathbb{E}_{(s,a) \sim d_{P_{tr}}^\pi} [\tau(s,a) f(s,a)] - \frac{1}{2} \mathbb{E}_{(s,a) \sim d_{P_{tr}}^\pi} [f(s,a)^2] + \lambda \mathbb{E}_{(s,a) \sim d_{P_{tr}}^\pi} [\eta \tau(s,a) - \eta^2/2]. \end{aligned}$$

#### 10.4 Proof of Lemma 10.1

Since  $\mathcal{Q}$  belongs to the RKHS space. We can use the reproducible property of RKHS to re-write the optimization in the following form.

$$\begin{aligned} L_w(w, \beta, q)^2 &= (\mathbb{E}_{(s,a) \sim \mu, s' \sim P_{te}(s,a)} [w(s,a) \cdot \beta(s,a) \cdot (q(s,a) - \gamma q(s', \pi))] - (1 - \gamma) \mathbb{E}_{s \sim d_0} [q(s, \pi)])^2 \\ &= (\mathbb{E}_{(s,a) \sim \mu, s' \sim P_{te}(s,a)} [w(s,a) \cdot \beta(s,a) \cdot (\langle q, K((s,a), \cdot) \rangle_{\mathcal{H}_K} - \gamma \mathbb{E}_{a' \sim \pi(s')} [\langle q, K((s', a'), \cdot) \rangle_{\mathcal{H}_K}]) \\ &\quad - (1 - \gamma) \mathbb{E}_{s \sim d_0, a \sim \pi(\cdot|s)} [\langle q, K((s,a), \cdot) \rangle_{\mathcal{H}_K}])])^2 \\ &= \max_{q \in \mathcal{Q}} \langle q, q^* \rangle_{\mathcal{H}_K}^2 \end{aligned} \tag{15}$$

Where,

$$q^*(\cdot) = \mathbb{E}_\mu [w(s,a) \cdot \beta(s,a) \cdot (K((s,a), \cdot) - \gamma \mathbb{E}_{a' \sim \pi(s')} [K((s', a'), \cdot)]) - (1 - \gamma) \mathbb{E}_{s \sim d_0, a \sim \pi(\cdot|s)} [K((s,a), \cdot)]] \tag{16}$$

We go from first line to the second line by exploiting the linear properties of the RKHS function space. Given the constraint that  $\mathcal{Q} = \{q : \mathcal{S} \times \mathcal{A} \rightarrow \mathbb{R}; \langle q, q \rangle_{\mathcal{H}_K} \leq 1\}$  we can maximise  $\max_q L(w, \beta, q)^2$  using Cauchy-Schwartz inequality

$$\begin{aligned} \max_q L_w(w, \beta, q)^2 &= \langle q^*, q^* \rangle_{\mathcal{H}_K}^2 \\ &= \mathbb{E}_{(s,a,s') \sim \mu} [w(s,a) \cdot w(\tilde{s}, \tilde{a}) \cdot \beta(s,a) \cdot \beta(\tilde{s}, \tilde{a}) \cdot (K((s,a), (\tilde{s}, \tilde{a})) - 2\gamma \mathbb{E}_{a' \sim \pi(s')} [K((s', a'), (\tilde{s}, \tilde{a}))]) \\ &\quad + \gamma^2 \mathbb{E}_{a' \sim \pi(s')} [K((s', a'), (\tilde{s}', \tilde{a}'))]] - 2(1 - \gamma) \mathbb{E}_{(s,a,s') \sim \mu} [w(s,a) \cdot \beta(s,a) \cdot (K((s,a), (\tilde{s}, \tilde{a})) \\ &\quad - \gamma \mathbb{E}_{a' \sim \pi(s')} [K((s', a'), (\tilde{s}, \tilde{a}))]) + (1 - \gamma)^2 \mathbb{E}_{s \sim d_0, a \sim \pi(\cdot|s)} [K((s,a), (\tilde{s}, \tilde{a}))]] \end{aligned}$$

This completes the proof.

## 10.5 Proof of Lemma 10.2

Substituting the functional forms for  $q(s, a) = \Psi(s, a)^T \zeta$  and  $w(s, a) = \phi(s, a)^T \alpha$  we get the following expression for  $L_{n,w}(w, \hat{\beta}, q)$ . Where,  $\hat{\beta}$  is an estimate of  $\frac{d_{P_{tr}}^\pi}{\mu}$

$$L_{n,w}(w, \hat{\beta}, q) = \mathbb{E}_{n,\mu}[\phi(s, a)^T \alpha \cdot \hat{\beta}(s, a) \cdot (\Psi(s, a) - \gamma \Psi(s', \pi))^T \zeta] - (1 - \gamma) \mathbb{E}_{n,d_0}[\Psi(s, \pi)^T \zeta]$$

Using the uniqueness condition we derived in equation 6, we can go about finding the value of  $\alpha$  by equating  $L(w, \hat{\beta}, q)$  to zero.

$$\begin{aligned} \mathbb{E}_{n,\mu}[\phi(s, a)^T \alpha \cdot \hat{\beta}(s, a) \cdot (\Psi(s, a) - \gamma \Psi(s', \pi))^T \zeta] - (1 - \gamma) \mathbb{E}_{n,d_0}[\Psi(s, \pi)^T \zeta] &= 0 \\ \alpha^T \mathbb{E}_{n,\mu}[\phi(s, a) \cdot \hat{\beta}(s, a) \cdot (\Psi(s, a) - \gamma \Psi(s', \pi))^T] \zeta &= (1 - \gamma) \mathbb{E}_{n,d_0}[\Psi(s, \pi)^T] \zeta \end{aligned}$$

Since the loss is linear in  $\zeta$ , we can solve for  $\alpha$  using the matrix inversion operation.

$$\hat{\alpha} = (\mathbb{E}_{n,\mu}[(\Psi(s, a) - \gamma \Psi(s', \pi)) \cdot \phi(s, a)^T \cdot \hat{\beta}])^{-1} (1 - \gamma) \mathbb{E}_{n,d_0}[\Psi(s, \pi)]$$

This completes the proof.

## 10.6 Proof of Lemma 10.3

Consider the loss function  $\sup_{w \in \mathcal{W}} L_q(w, \beta, q)^2$ . Since  $\mathcal{W}$  is in RKHS space. Using reproducible property of RKHS space we can re-write this maximization as follows,

$$\begin{aligned} \max_{w \in \mathcal{W}} L_q(w, \beta, q)^2 &= \max_{w \in \mathcal{W}} (\mathbb{E}_{(s,a) \sim \mu, s' \sim P(s,a), r \sim R(s,a)}[w(s, a) \cdot \beta(s, a) \cdot (q(s, a) - \gamma q(s', \pi))] - \mathbb{E}_{(s,a) \sim d_{P_{tr}}^\pi, r \sim R(s,a)}[w(s, a)])^2 \\ &= \max_{w \in \mathcal{W}} (\mathbb{E}_{(s,a) \sim \mu, s' \sim P(s,a), r \sim R(s,a)}[\langle w, K(s, a), \cdot \rangle_{\mathcal{H}_K} \cdot \beta(s, a) \cdot (q(s, a) - \gamma q(s', \pi))] - \mathbb{E}_{(s,a) \sim d_{P_{tr}}^\pi, r \sim R(s,a)}[\langle w, K(s, a), \cdot \rangle_{\mathcal{H}_K}])^2 \\ &= \max_{w \in \mathcal{W}} \langle w, \mathbb{E}_{(s,a) \sim \mu, s' \sim P(s,a), r \sim R(s,a)}[K((s, a), \cdot) \cdot \beta(s, a) \cdot (q(s, a) - \gamma q(s', \pi))] - \mathbb{E}_{(s,a) \sim d_{P_{tr}}^\pi, r \sim R(s,a)}[K((s, a), \cdot) \cdot r] \rangle_{\mathcal{H}_K}^2 \\ &= \max_{w \in \mathcal{W}} \langle w, w^* \rangle_{\mathcal{H}_K}^2 = \langle w^*, w^* \rangle_{\mathcal{H}_K}^2 \end{aligned}$$

Where, we use the linear properties of RKHS spaces and then followed by using Cauchy-Schwartz inequality, to compute the maximization. Where,  $w^*$  has the following expression.

$$w^*(\cdot) = \mathbb{E}_{(s,a) \sim \mu, s' \sim P(s,a), r \sim R(s,a)}[K((s, a), \cdot) \cdot \beta(s, a) \cdot (q(s, a) - \gamma q(s', \pi))] - \mathbb{E}_{(s,a) \sim d_{P_{tr}}^\pi, r \sim R(s,a)}[K((s, a), \cdot) \cdot r]$$

The maximization expression thus takes the following form

$$\begin{aligned} \langle w^*, w^* \rangle_{\mathcal{H}_K}^2 &= \mathbb{E}_{(s,a) \sim \mu, s' \sim P(s,a), r \sim R(s,a)}[K((s, a), (\tilde{s}, \tilde{a})) \cdot \beta(s, a) \cdot \beta(\tilde{s}, \tilde{a}) \cdot \Delta(q, s, a, s') \cdot \Delta(q, \tilde{s}, \tilde{a}, \tilde{s}')] \\ &\quad - 2 \mathbb{E}_{\substack{(s,a) \sim \mu, s' \sim P(s,a) \\ (\tilde{s}, \tilde{a}) \sim d_{P_{tr}}^\pi, \tilde{r} \sim R(s,a)}}[K((s, a), (\tilde{s}, \tilde{a})) \cdot \beta(s, a) \cdot \Delta(q, s, a, s') \cdot r] + \mathbb{E}_{\substack{(s,a) \sim d_{P_{tr}}^\pi, r \sim R(s,a) \\ (\tilde{s}, \tilde{a}) \sim d_{P_{tr}}^\pi, \tilde{r} \sim R(s,a)}}[K((s, a), (\tilde{s}, \tilde{a})) \cdot r \cdot \tilde{r}] \end{aligned}$$

Where,  $\Delta(q, s, a, s') = q(s, a) - \gamma q(s', \pi)$ .

This completes the proof.

## 10.7 Proof of Lemma 10.4

Substituting the functional forms of  $q(s, a) = \Psi(s, a)^T \zeta$ ,  $w(s, a) = \phi(s, a)^T \alpha$ . Also substituting the estimate for  $\frac{d_{P_{tr}}^\pi}{\mu}$  as  $\hat{\beta}$ . We get the following expression

$$\begin{aligned} L_{q,n}(w, \hat{\beta}, q) &= \\ &= \mathbb{E}_{n,(s,a) \sim \mu, s' \sim P(s,a), r \sim R(s,a)}[\phi(s, a)^T \alpha \cdot \hat{\beta}(s, a) \cdot (\Psi(s, a)^T \zeta - \gamma \Psi(s', \pi)^T \zeta)] - \mathbb{E}_{n,(s,a) \sim d_{P_{tr}}^\pi, r \sim R(s,a)}[\phi(s, a)^T \alpha \cdot r] \\ &= 0 \end{aligned}$$

Where, the equality comes from the uniqueness condition similar to equation 6

$$\alpha^T \mathbb{E}_{n,(s,a) \sim \mu, s' \sim P(s,a), r \sim R(s,a)}[\phi(s, a) \cdot \hat{\beta}(s, a) \cdot (\Psi(s, a) - \gamma \Psi(s', \pi))^T] \zeta = \alpha^T \mathbb{E}_{n,(s,a) \sim d_{P_{tr}}^\pi, r \sim R(s,a)}[\phi(s, a) \cdot r]$$

Since the equations above are linear in  $\alpha$ . So it suffices to show that the optimal solution can be

reached if  $\beta$  is approximated as follows,

$$\hat{\zeta} = (\mathbb{E}_{n,(s,a) \sim \mu, s' \sim P(s,a), r \sim R(s,a)}[\phi(s, a) \cdot \hat{\beta}(s, a) \cdot (\Psi(s, a) - \gamma \Psi(s', \pi))^T])^{-1} \cdot \mathbb{E}_{n,(s,a) \sim d_{P_{tr}}^\pi, r \sim R(s,a)}[\phi(s, a) \cdot r] \quad (17)$$

Where,  $\mathbb{E}_{n,\cdot}$  denotes the empirical approximation of the expectation. This completes the proof.

425 **10.8 Proof of Theorem 5.1**

426 To prove this theorem, we will first require a Lemma that we need to prove first. This is as follows,

427 **Lemma 10.6.** *Under Assumptions 1 and 2, suppose we use  $n$  samples each from distribution  $P$  and*  
 428  *$Q$  to empirically estimate the ratio of  $\frac{P}{Q}$  using equation 2. The estimation error can be bounded with*  
 429 *probability at least  $1 - \delta$  as follows:*

$$\left\| \hat{f}_n - \frac{P}{Q} \right\|_{\infty}^2 \leq \tilde{O} \left( \left\| \frac{P}{Q} \right\|_{\infty} \left( 4\mathbb{E}\mathcal{R}_n(\mathcal{F}) + \sqrt{\frac{2\log(\frac{1}{\delta})}{n}} \right) \right) \quad (18)$$

430 *Proof.* Since, equation 2 is optimized using empirical samples it is an Empirical Risk Minimization  
 431 (ERM) algorithm. We denote the original loss with respect to a function  $f \in \mathcal{F}$  as  $L(f)$ . Using  
 432 familiar result from learning theory (Corollary 6.1 [28]) with probability at-least  $1 - \delta$

$$L(\hat{f}_n) - L\left(\frac{P}{Q}\right) \leq 4\mathbb{E}\mathcal{R}_n(\mathcal{F}) + C_{\mathcal{F}} \sqrt{\frac{2\log(\frac{1}{\delta})}{n}} \quad (19)$$

433 With probability at least  $1 - \delta$ . Where,  $\mathcal{R}_n(\mathcal{F})$  is the Radamacher complexity of the function class

$$\{(p, q) \rightarrow f(q) - \log(f(p)) : f \in \mathcal{F}\} \quad (20)$$

434 Now, let's turn our attention to the left hand side. Before we end up doing that let's define the  
 435 estimation error  $\bar{e}_n(x) = \hat{f}_n(x) - \frac{P(x)}{Q(x)}$ . Thus, we can re-write the left hand side in terms of  $\bar{e}$

$$\begin{aligned} L(\hat{f}_n) - L\left(\frac{P}{Q}\right) &= L\left(\frac{P}{Q} + \bar{e}_n\right) - L\left(\frac{P}{Q}\right) \\ &= \sum_{x \in \Omega} Q(x) \bar{e}_n(x) - \sum_{x \in \Omega} P(x) \log\left(\frac{\bar{e}_n(x) + \frac{P(x)}{Q(x)}}{\frac{P(x)}{Q(x)}}\right) \\ &= \sum_{x \in \Omega} Q(x) \left( \bar{e}_n(x) - \frac{P(x)}{Q(x)} \log\left(1 + \frac{\bar{e}_n(x)}{\frac{P(x)}{Q(x)}}\right) \right) \end{aligned} \quad (21)$$

436 Assuming that  $n$  is sufficiently large such that  $|\frac{\bar{e}_n}{g^*}| \leq 1$ . We can now use second order Taylor  
 437 approximation for  $\log(1 + x)$  for  $|x| < 1$

$$\begin{aligned} L(\hat{f}_n) - L\left(\frac{P}{Q}\right) &= \sum_{x \in \Omega} Q(x) (\bar{e}_n(x) \\ &\quad - \frac{P(x)}{Q(x)} \cdot \left( \frac{\bar{e}_n(x)}{\frac{P(x)}{Q(x)}} - \frac{1}{2} \left( \frac{\bar{e}_n(x)}{\frac{P(x)}{Q(x)}} \right)^2 \right)) \\ &= \sum_{x \in \Omega} Q(x) \frac{1}{2} \left( \frac{\bar{e}_n(x)}{\frac{P(x)}{Q(x)}} \right)^2 \end{aligned} \quad (22)$$

438 Combining equations 19 with the simplified LHS above, we can bound the error with probability at  
 439 least  $1 - \delta$  that,

$$\sum_{x \in \Omega} Q(x) \frac{1}{2} \left( \frac{\bar{e}_n(x)}{\frac{P(x)}{Q(x)}} \right)^2 \leq 4\mathbb{E}\mathcal{R}_n(\mathcal{F}) + C_{\mathcal{F}} \sqrt{\frac{2\log(\frac{1}{\delta})}{n}} \quad (23)$$

Under assumption 1 and 2  $\exists \tilde{x} \in \Omega$  such that  $|\bar{e}_n(\tilde{x})| = \|\hat{f}_n - \frac{P}{Q}\|_\infty$ . Thus, the equation above can be re-written as

$$\begin{aligned} \frac{1}{K} \|\bar{e}_n\|_\infty^2 &\leq 2 \frac{P(\tilde{x})}{Q(\tilde{x})} \left( 4\mathbb{E}\mathcal{R}_n(\mathcal{F}) + C_{\mathcal{F}} \sqrt{\frac{2 \log(\frac{1}{\delta})}{n}} \right) \\ \|\bar{e}_n\|_\infty^2 &\leq 2K \cdot \left\| \frac{P}{Q} \right\|_\infty \left( 4\mathbb{E}\mathcal{R}_n(\mathcal{F}) + C_{\mathcal{F}} \sqrt{\frac{2 \log(\frac{1}{\delta})}{n}} \right) \end{aligned} \quad (24)$$

Where  $Q(\tilde{x}) = \frac{1}{K}$ . The last inequality comes from the fact that  $\frac{P(\tilde{x})}{Q(\tilde{x})} \leq \sup_{x \in \Omega} \frac{P(x)}{Q(x)} = \left\| \frac{P}{Q} \right\|_\infty$ . This completes the proof.  $\square$

Using equation 4 we can upper bound the performance of our estimator as follows,

$$\begin{aligned} |\mathbb{E}_{(s,a) \sim d_{P^\pi}^\pi, r \sim R(s,a)}[\hat{w}_n \cdot r] - J_P(\pi)| &\leq \max_{q \in \mathcal{Q}} |L_w(\hat{w}_n, \frac{d_{P^\pi}^\pi}{\mu}, q)| \\ \hat{w}_n &= \arg \min_{w \in \mathcal{W}} \max_{q \in \mathcal{Q}} L_{n,w}(w, \hat{\beta}, q) \end{aligned} \quad (25)$$

We also approximate  $\frac{d_{P_{tr}}^\pi}{\mu} \sim \hat{\beta}$ . This can be written as follows,

$$\hat{\beta} = \arg \max_{f \in \mathcal{F}} \frac{1}{n} \sum_i \ln f(x_i) - \frac{1}{m} \sum_j f(\tilde{x}_j) + \frac{\lambda}{2} I(f)^2, \quad (26)$$

where  $I(f)$  is some regularization function to improve the statistical and computational stability of learning. We can simplify the RHS of this upper-bound using the following simplification.

$$\begin{aligned} |\mathbb{E}_{(s,a) \sim d_{P^\pi}^\pi, r \sim R(s,a)}[\hat{w}_n \cdot r] - J_P(\pi)| &\leq \max_{q \in \mathcal{Q}} |L_w(\hat{w}_n, \frac{d_{P^\pi}^\pi}{\mu}, q)| \\ &\leq \max_{q \in \mathcal{Q}} |L_w(\hat{w}_n, \frac{d_{P^\pi}^\pi}{\mu}, q)| - \max_{q \in \mathcal{Q}} |L_{n,w}(\hat{w}_n, \frac{d_{P^\pi}^\pi}{\mu}, q)| + \max_{q \in \mathcal{Q}} |L_{n,w}(\hat{w}_n, \frac{d_{P^\pi}^\pi}{\mu}, q)| - \max_{q \in \mathcal{Q}} |L_w(\hat{w}, \frac{d_{P^\pi}^\pi}{\mu}, q)| + \\ &\max_{q \in \mathcal{Q}} |L_w(\hat{w}, \frac{d_{P^\pi}^\pi}{\mu}, q)| - \max_{q \in \mathcal{Q}} |L_w(\hat{w}, \hat{\beta}, q)| + \max_{q \in \mathcal{Q}} |L_w(\hat{w}, \hat{\beta}, q)| - \max_{q \in \mathcal{Q}} |L_w(\hat{w}, \frac{d_{P^\pi}^\pi}{\mu}, q)| + \max_{q \in \mathcal{Q}} |L_w(\hat{w}, \frac{d_{P^\pi}^\pi}{\mu}, q)| \\ &\leq \max_{q \in \mathcal{Q}} |L_w(\hat{w}_n, \frac{d_{P^\pi}^\pi}{\mu}, q)| - \max_{q \in \mathcal{Q}} |L_{n,w}(\hat{w}_n, \frac{d_{P^\pi}^\pi}{\mu}, q)| + \max_{q \in \mathcal{Q}} |L_{n,w}(\hat{w}, \frac{d_{P^\pi}^\pi}{\mu}, q)| - \max_{q \in \mathcal{Q}} |L_w(\hat{w}, \frac{d_{P^\pi}^\pi}{\mu}, q)| \\ &+ \max_{q \in \mathcal{Q}} |L_w(\hat{w}, \frac{d_{P^\pi}^\pi}{\mu}, q)| - \max_{q \in \mathcal{Q}} |L_w(\hat{w}, \hat{\beta}, q)| + \max_{q \in \mathcal{Q}} |L_w(\hat{w}, \hat{\beta}, q)| - \max_{q \in \mathcal{Q}} |L_w(\hat{w}, \frac{d_{P^\pi}^\pi}{\mu}, q)| + \max_{q \in \mathcal{Q}} |L_w(\hat{w}, \frac{d_{P^\pi}^\pi}{\mu}, q)| \\ &\leq 2 \underbrace{\max_{q \in \mathcal{Q}, w \in \mathcal{W}} |L_w(\hat{w}_n, \frac{d_{P^\pi}^\pi}{\mu}, q)| - |L_{n,w}(\hat{w}_n, \frac{d_{P^\pi}^\pi}{\mu}, q)|}_{T1} + 2 \underbrace{\max_{q \in \mathcal{Q}} |L_w(\hat{w}, \frac{d_{P^\pi}^\pi}{\mu}, q) - L_w(\hat{w}, \hat{\beta}, q)|}_{T2} + \min_{w \in \mathcal{W}} \max_{q \in \mathcal{Q}} |L_w(w, \frac{d_{P_{tr}}^\pi}{\mu}, q)| \end{aligned}$$

Where,  $\hat{w} = \arg \min_{w \in \mathcal{W}} \max_{q \in \mathcal{Q}} |L_w(w, \hat{\beta}, q)|$ . Let's analyse each of the terms above one by one. Starting with T1 we get the following,

$$\begin{aligned} T1 &= 2 \max_{q \in \mathcal{Q}, w \in \mathcal{W}} |L_w(\hat{w}_n, \frac{d_{P^\pi}^\pi}{\mu}, q)| - |L_{n,w}(\hat{w}_n, \frac{d_{P^\pi}^\pi}{\mu}, q)| \\ &\leq 2\mathcal{R}_n(\mathcal{W}, \mathcal{Q}) + C_{\mathcal{W}} \cdot C_{\mathcal{Q}} \sqrt{\frac{\log(\frac{2}{\delta})}{2n}} \quad \text{w.p at-least } 1 - \frac{\delta}{2} \end{aligned} \quad (27)$$

Where, the upper bound follows from [29]. Note that  $\mathcal{R}_n(\mathcal{W}, \mathcal{Q})$  is the Radamacher Complexity for the following function class

$$\{(s, a, s') \rightarrow w(s, a) \frac{d_{P_{tr}}^\pi(s, a)}{\mu(s, a)} (q(s, a) - \gamma q(s', \pi)) : w \in \mathcal{W}, q \in \mathcal{Q}\} \quad (28)$$

452 For the term T2 we can simplify the expression as follows,

$$\begin{aligned}
T2 &= 2 \max_{q \in \mathcal{Q}} |L_w(\hat{w}, \frac{d_{P_{te}}^\pi}{\mu}, q) - L_w(\hat{w}, \hat{\beta}, q)| \\
&= \max_{q \in \mathcal{Q}} |\mathbb{E}_{(s,a,s') \sim \mu} [(\hat{\beta} - \frac{d_{P'}^\pi}{\mu}) \cdot \hat{w}(s,a) \cdot (q(s,a) - \gamma q(s', \pi))]| \\
&= \max_{q \in \mathcal{Q}} |\mathbb{E}_{(s,a,s') \sim \mu} [\varepsilon(s,a) \cdot \hat{w}(s,a) \cdot (q(s,a) - \gamma q(s', \pi))]| \leq 2C_{\mathcal{Q}} \cdot C_{\mathcal{W}} \|\varepsilon\|_{\infty}
\end{aligned} \tag{29}$$

453 Here, we assume that  $\varepsilon(s,a) = \hat{\beta} - \frac{d_{P'}^\pi}{\mu}$ . Combining equations 27, 29 along with equation 24 we get  
454 the following upper-bound with at-least  $1 - \delta$

$$|\mathbb{E}_{(s,a) \sim d_P^\pi, r \sim R(s,a)} [\hat{w}_n \cdot r] - J_P(\pi)| \leq \max_{q \in \mathcal{Q}} |L_w(\hat{w}, \frac{d_{P_{tr}}^\pi}{\mu}, q)| + 4\gamma C_{\mathcal{W}} \cdot C_{\mathcal{Q}} \cdot \|\varepsilon\|_{\infty} + 2\mathcal{R}_n(\mathcal{W}, \mathcal{Q}) + C_{\mathcal{W}} \cdot C_{\mathcal{Q}} \sqrt{\frac{\log(\frac{2}{\delta})}{2n}} \tag{30}$$

455 Using Lemma 10.6 we can bound  $\|\varepsilon\|_{\infty}$  with probability  $1 - \frac{\delta}{2}$  as follows,

$$\begin{aligned}
|\mathbb{E}_{(s,a) \sim d_P^\pi, r \sim R(s,a)} [\hat{w}_n \cdot r] - J_P(\pi)| &\leq \min_{w \in \mathcal{W}} \max_{q \in \mathcal{Q}} |L_w(w, \frac{d_{P_{tr}}^\pi}{\mu}, q)| \\
&+ 4C_{\mathcal{W}} \cdot C_{\mathcal{Q}} \cdot \sqrt{2K \cdot \|\frac{d_{P_{tr}}^\pi}{\mu}\|_{\infty} \left( 4\mathbb{E}\mathcal{R}_n(\mathcal{F}) + C_{\mathcal{F}} \sqrt{\frac{2\log(\frac{2}{\delta})}{n}} \right) + 4\mathcal{R}_n(\mathcal{W}, \mathcal{Q}) + 2C_{\mathcal{W}} \cdot C_{\mathcal{Q}} \sqrt{\frac{\log(\frac{2}{\delta})}{2n}}}
\end{aligned} \tag{31}$$

456 This completes the proof.

457

## 458 10.9 Proof of Theorem 10.5

459 Using equation 11, we can bound the performance of the q estimator as follows,

$$\begin{aligned}
|(1 - \gamma)\mathbb{E}_{d_0}[\hat{q}_n(s, \pi)] - J_P(\pi)| &\leq \max_{w \in \mathcal{W}} |L_q(w, \frac{d_{P_{te}}^\pi}{\mu}, \hat{q}_n)| \\
&\leq \max_{w \in \mathcal{W}} |L_q(w, \frac{d_{P_{te}}^\pi}{\mu}, \hat{q}_n)| - \max_{w \in \mathcal{W}} |L_{n,q}(w, \frac{d_{P_{te}}^\pi}{\mu}, \hat{q}_n)| + \max_{w \in \mathcal{W}} |L_{n,q}(w, \frac{d_{P_{te}}^\pi}{\mu}, \hat{q}_n)| - \max_{w \in \mathcal{W}} |L_q(w, \frac{d_{P_{tr}}^\pi}{\mu}, \hat{q})| \\
&+ \max_{w \in \mathcal{W}} |L_q(w, \frac{d_{P_{tr}}^\pi}{\mu}, \hat{q})| - \max_{w \in \mathcal{W}} |L_q(w, \hat{\beta}, \hat{q})| + \max_{w \in \mathcal{W}} |L_q(w, \hat{\beta}, \hat{q})| - \max_{w \in \mathcal{W}} |L_q(w, \frac{d_{P_{tr}}^\pi}{\mu}, \hat{q})| + \max_{w \in \mathcal{W}} |L_q(w, \frac{d_{P_{tr}}^\pi}{\mu}, \hat{q})| \\
&\leq \max_{w \in \mathcal{W}} |L_q(w, \frac{d_{P_{te}}^\pi}{\mu}, \hat{q}_n)| - \max_{w \in \mathcal{W}} |L_{n,q}(w, \frac{d_{P_{te}}^\pi}{\mu}, \hat{q}_n)| + \max_{w \in \mathcal{W}} |L_{n,q}(w, \frac{d_{P_{te}}^\pi}{\mu}, \hat{q}_n)| - \max_{w \in \mathcal{W}} |L_q(w, \frac{d_{P_{tr}}^\pi}{\mu}, \hat{q}_n)| \\
&+ \max_{w \in \mathcal{W}} |L_q(w, \frac{d_{P_{tr}}^\pi}{\mu}, \hat{q})| - \max_{w \in \mathcal{W}} |L_q(w, \hat{\beta}, \hat{q})| + \max_{w \in \mathcal{W}} |L_q(w, \hat{\beta}, \hat{q})| - \max_{w \in \mathcal{W}} |L_q(w, \frac{d_{P_{tr}}^\pi}{\mu}, \hat{q})| + \max_{w \in \mathcal{W}} |L_q(w, \frac{d_{P_{tr}}^\pi}{\mu}, \hat{q})| \\
&\leq 2 \underbrace{\max_{q \in \mathcal{Q}, w \in \mathcal{W}} |L_q(w, \frac{d_{P_{te}}^\pi}{\mu}, q) - L_{n,q}(w, \frac{d_{P_{te}}^\pi}{\mu}, q)|}_{T1} + 2 \underbrace{\max_{w \in \mathcal{W}} |L_q(w, \frac{d_{P_{tr}}^\pi}{\mu}, \hat{q}) - L_q(w, \hat{\beta}, \hat{q})|}_{T2} + \min_{q \in \mathcal{Q}} \max_{w \in \mathcal{W}} |L_q(w, \frac{d_{P_{tr}}^\pi}{\mu}, q)|
\end{aligned} \tag{32}$$

460 Where,  $\hat{q} = \arg \min_{q \in \mathcal{Q}} \max_{q \in \mathcal{W}} |L_q(w, \hat{\beta}, q)|$ . Lets analyse each of these terms T1, T2 separately.

461 For T1 we get the following,

$$\begin{aligned}
T1 &= 2 \max_{q \in \mathcal{Q}, w \in \mathcal{W}} |L_q(w, \frac{d_{P_{te}}^\pi}{\mu}, q) - L_{n,q}(w, \frac{d_{P_{te}}^\pi}{\mu}, q)| \\
&\leq 2\mathcal{R}_n(\mathcal{W}, \mathcal{Q}) + C_{\mathcal{W}} \cdot \frac{R_{\max}}{1 - \gamma} \sqrt{\frac{\log(\frac{2}{\delta})}{2n}} \quad \text{w.p at-least } 1 - \frac{\delta}{2}
\end{aligned} \tag{33}$$

Where, the upper bound follows from [29]. Note that  $\mathcal{R}_n(\mathcal{W}, \mathcal{Q})$  is the Radamacher Complexity for the following function class

$$\{(s, a, s') \rightarrow w(s, a) \frac{d_{P_{tr}}^\pi(s, a)}{\mu(s, a)} (q(s, a) - \gamma q(s', \pi)) : w \in \mathcal{W}, q \in \mathcal{Q}\} \quad (34)$$

For the term T2 we can simplify the expression as follows,

$$\begin{aligned} T2 &= 2 \max_{w \in \mathcal{W}} |L_q(w, \frac{d_{P_{tr}}^\pi}{\mu}, \hat{q}) - L_q(w, \hat{\beta}, \hat{q})| \\ &= \max_{w \in \mathcal{W}} |\mathbb{E}_{(s, a, s') \sim \mu} [(\hat{\beta} - \frac{d_{P'}^\pi}{\mu}) \cdot w(s, a) \cdot (\hat{q}(s, a) - \gamma \hat{q}(s', \pi))]| \\ &\leq 2C_{\mathcal{W}} \frac{R_{max}}{1 - \gamma} \|\varepsilon\|_\infty \end{aligned} \quad (35)$$

Combining equation 33 and 35 along with equation 24 we can bound the error in evaluation as follows,

$$\begin{aligned} |(1 - \gamma) \mathbb{E}_{d_0}[\hat{q}_n(s, \pi)] - J_P(\pi)| &\leq \min_{q \in \mathcal{Q}} \max_{w \in \mathcal{W}} L_q(w, \frac{d^\pi}{\mu}, q) + 2\mathcal{R}_n(\mathcal{W}, \mathcal{Q}) + 4C_{\mathcal{W}} \cdot \frac{R_{max}}{1 - \gamma} \sqrt{\frac{\log(\frac{2}{\delta})}{2n}} \\ &+ 2C_{\mathcal{W}} \frac{R_{max}}{1 - \gamma} \sqrt{2K \cdot \|\frac{d_{P_{tr}}^\pi}{\mu}\|_\infty \left( 4\mathbb{E}\mathcal{R}_n(\mathcal{F}) + C_{\mathcal{F}} \sqrt{\frac{2\log(\frac{2}{\delta})}{n}} \right)} \\ &\text{w.p at-least } 1 - \delta \end{aligned} \quad (36)$$

This completes the proof

## 10.10 Additional Experimental Details and Additional Results

**Experiment Setup** We conduct experiments on both Sim2Sim and Sim2Real environments. For Sim2Sim experiments we demonstrate our results over a range of different types of environments like Tabular (Taxi), Discrete-control (cartpole) and continuous control (Reacher and Halfcheetah). For the Sim2Sim experiments over a diverse set of simulation and the real world environments like gravity, arm-length, friction and maximum torque. For all the experiments we mention here, we will first generate an offline data which was collected using known behavior policy  $\mu$ . For the sake of these experiments, behavior policy are parameterized by a factor  $\delta$  which basically dictates the amount of noise added to a pre-trained model. We similarly parameterise the target policy target policy by  $\alpha$ . We experiment over different pairs of training and test environments. We typically keep the simulation environment fixed and vary the test environment. We call the key parametric difference between the training and the test environment as the Sim2Real gap. Detailed information for each set of experiments is provided below.

**Learning  $\beta$ :** We parameterize  $\beta$  as two-layered neural network with ReLU activation layers for intermediate layers. We experimented with two different kinds of final activation layer, squared and tanh. We observed that tanh layer scaled to go from 0 to 10 worked best for these set of experiments.

**Learning  $w$ :** For most of our experiments on  $\beta$ -DICE we use the framework of GradientDICE. GradientDICE algorithms are typically two layered neural networks which use orthogonal initialisation. Inner activation is ReLU and the final activation layer is linear.

**Baselines** We compare with the following baselines:

- **Simulator:** This is the baseline of trusting the simulator’s evaluation and not using data from the test environment.
- **Model-free MIS:** We include DualDICE, GradientDICE, GenDICE [21, 23, 22] as state-of-the-art baselines for model-free MIS, which only uses data from the test environment and does not use simulator information.



493 • Residual dynamics: We fit a model for OPE from test-environment data with the simulator  
 494 as the “base” prediction and only learn a correction term.

495 • DR-DICE [24]: the previous baselines ignore some of the available information (e.g.,  
 496 model-free MIS does not use simulator information) or use them in a naïve manner. There-  
 497 fore, we additionally include a doubly-robust (DR) MIS estimator [24] that can organically  
 498 blend the model information with the test-environment data.

499 **Taxi Environment:** Taxi environment has 500 states and 6 discrete actions. For these set of  
 500 experiments the simulator environment involves deterministic transition between two states. For  
 501 the real world environment, we experiment with environments where the transition is deterministic  
 502 with probability  $(1 - \tau)$  and random with probability  $\tau$ . With  $\tau$  being the Sim2Real gap. To collect  
 503 data, we use a behavior policy that chooses optimal action (which was learnt using Q-learning) with  
 504 probability  $1 - \delta$  and a random action with probability  $\delta$ . Target policies are similarly parameterised  
 505 but with  $\alpha$ . In figure 3 we demonstrate the performance of  $\beta$ -DICE for  $\alpha = 0.1$ . In these set  
 506 of experiments, we evaluate performance of  $\beta$ -DICE over 3 different types of behavior policies  
 507  $\delta = \{0.2, 0.3, 0.4\}$  and three different sets of target policies  $\alpha = \{0.01, 0.1, 0.2\}$ . For two sets  
 508 of behavior and target policy, we also show the effect of sim gap on evaluation error. We observe  
 509 that evaluation error increases with increasing sim2sim gap. For these set of experiments we used a  
 510 discounting factor  $\gamma = 0.9$  and limited our offline trajectory collection to 150 timesteps. Learning  
 511 rate for  $\beta$  is  $1e-4$ , the learning rate for  $w$  is  $1e-4$ . We observe that  $\beta$ -DICE is able to outperform the  
 512 state-of-the-art MIS baseline comfortably.

513 **Cartpole Environment:** For discrete control problems, we choose the Cartpole environment  
 514 [30]. For the simulator we choose cartpole environment with gravity equals to  $10m/s^2$ . For  
 515 the test environment, we choose gravity to be  $(\tau)m/s^2$ . With  $\tau$  being the Sim2Sim gap. Our  
 516 behavior policy is chosen to be a mixture of optimal policy (which was trained using Cross Entropy  
 517 method)  $\pi_*$  and a uniformly random policy  $U$  such that  $\mu = (1 - \delta)\pi_* + (\delta)U$ . Our target  
 518 policy is similarly parameterised by  $\alpha$ . We demonstrate results over different sets of behavior  
 519 policies  $\delta = \{0.4, 0.5, 0.6\}$  and evaluate performance over a set of  $\alpha = \{0.2, 0.5, 0.8\}$  and simreal  
 520 gap  $\tau = \{5, 10, 20\}m/s^2$ . In figures 2a and 4 (with additional baselines), we demonstrate our  
 521 experiments over different sets of behavior policies and target policies and observe that our method  
 522 is more than capable of improving upon state-of-the-art baseline with information from simulation.  
 523 Our discounting factor  $\gamma = 0.99$  and timesteps is limited to 200. Learning rate for  $\beta$  is  $1e-4$  and  
 524 learning rate for  $w$  is  $1e-2$ .

525 **Reacher Environment:** For continuous control, we experiment with RoboschoolReacher envi-  
 526 ronment. For these set of environments, we choose training environment as the one where the  
 527 length of both links are 0.1 m. The test environment is chosen to be one, where the length of both  
 528 the links is  $(0.1 + \tau)m$ . We choose behavior policy as the addition of an optimal policy plus a  
 529 zero mean normal policy whose standard deviation is  $\delta$ . For our experiments,  $\delta = \{0.4, 0.5, 0.6\}$ ,  
 530  $\alpha = \{0.0, 0.1, 0.2\}$  and  $\tau = \{-0.5, -0.25, 0.0, 0.25\}m$ . In figures 2b and 5, we demonstrate our  
 531 experiments over different sets of behavior policies and target policies and observe that our method  
 532 is more than capable of improving upon state-of-the-art baseline with information from simulation.  
 533 In figure 2b and 5a, we also demonstrate the effect of  $\beta$ -DICE with sim2sim gap over two sets of  
 534  $(\delta, \alpha)$ . Our discounting factor  $\gamma = 0.99$  and timesteps is limited to 150. Learning rate for  $\beta$  is  $1e-4$   
 535 and learning rate for  $w$  is  $3e-3$ .

536 **HalfCheetah Environment:** For continuous control, we experiment with RoboschoolCheetah  
 537 environment. For these set of environments, we choose training environment as the one where  
 538 the maximum torque to the joints is 0.9. The test environment is chosen to be one, where the  
 539 length of both the links is  $0.9 + \tau$  N.m We choose behavior policy as the addition of an optimal  
 540 policy with zero mean normal policy whose standard deviation is  $\delta$ . For behavior policy the delta  
 541 is taken to be  $\delta = \{0.4, 0.5, 0.6\}$  and the target policy is taken to be  $\alpha = \{0.0, 0.1, 0.2\}$ . Due to  
 542 limited computation, we experimented only with  $\tau = 0.4Nm$ . In figures 6, we demonstrate our  
 543 experiments over different sets of behavior policies and target policies and observe that our method  
 544 is more than capable of improving upon state-of-the-art baseline with information from simulation.

545 Our discounting factor  $\gamma = 0.99$  and timesteps is limited to 150. Learning rate for  $\beta, w$  is  $1e-4$ .  
546

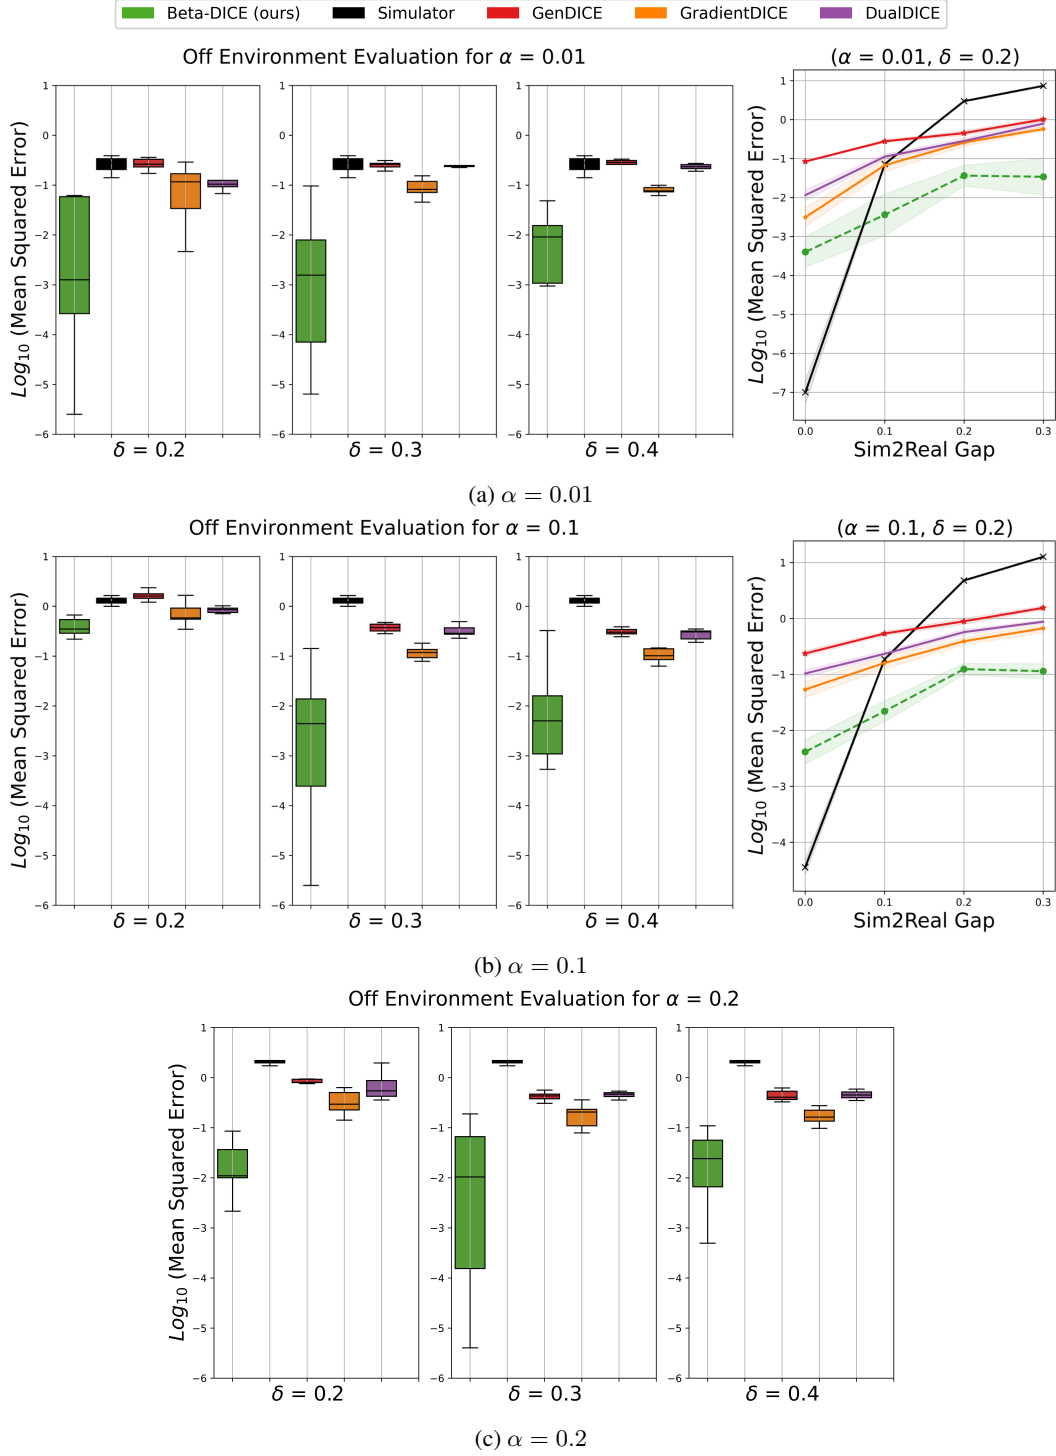

Figure 3: Each of the above figure demonstrates the effect of evaluation over varying behavior policies  $\delta = \{0.2, 0.3, 0.4\}$  on a fixed target policy using  $\beta$ -DICE for the taxi environment. For these set of experiments the training environment is the default transition parameters, while the test environment has  $\tau = 0.1$ . In (a), (b), (c) the target policies that we use are  $\alpha = \{0.01, 0.1, 0.2\}$ . Additionally for (a), (b) (RHS) we also show the effect of varying sim2real gap on target policy evaluation using  $\beta$ -DICE (while keeping  $\delta, \alpha$  fixed).

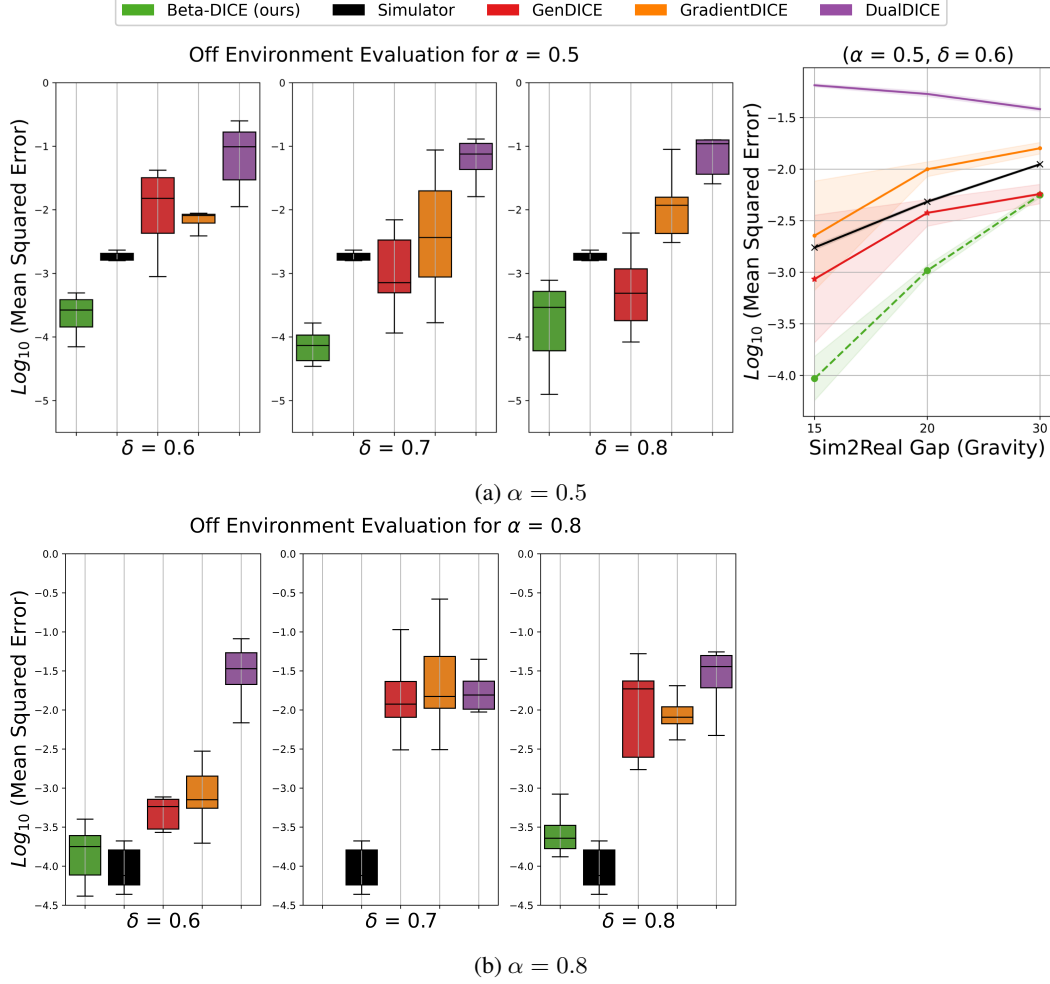

Figure 4: Each of the above figure demonstrates the effect of evaluation over varying behavior policies  $\delta = \{0.6, 0.7, 0.8\}$  on a fixed target policy using  $\beta$ -DICE for the cartpole environment. For these set of experiments the training environment has gravity =  $10m/s^2$ , while the test environment has gravity =  $15.0m/s^2$ . In (a), (b) the target policies that we use are  $\alpha = \{0.5, 0.8\}$ . Additionally for (a), (RHS) we also show the effect of varying sim2real gap on target policy evaluation using  $\beta$ -DICE (while keeping  $\delta, \alpha$  fixed).

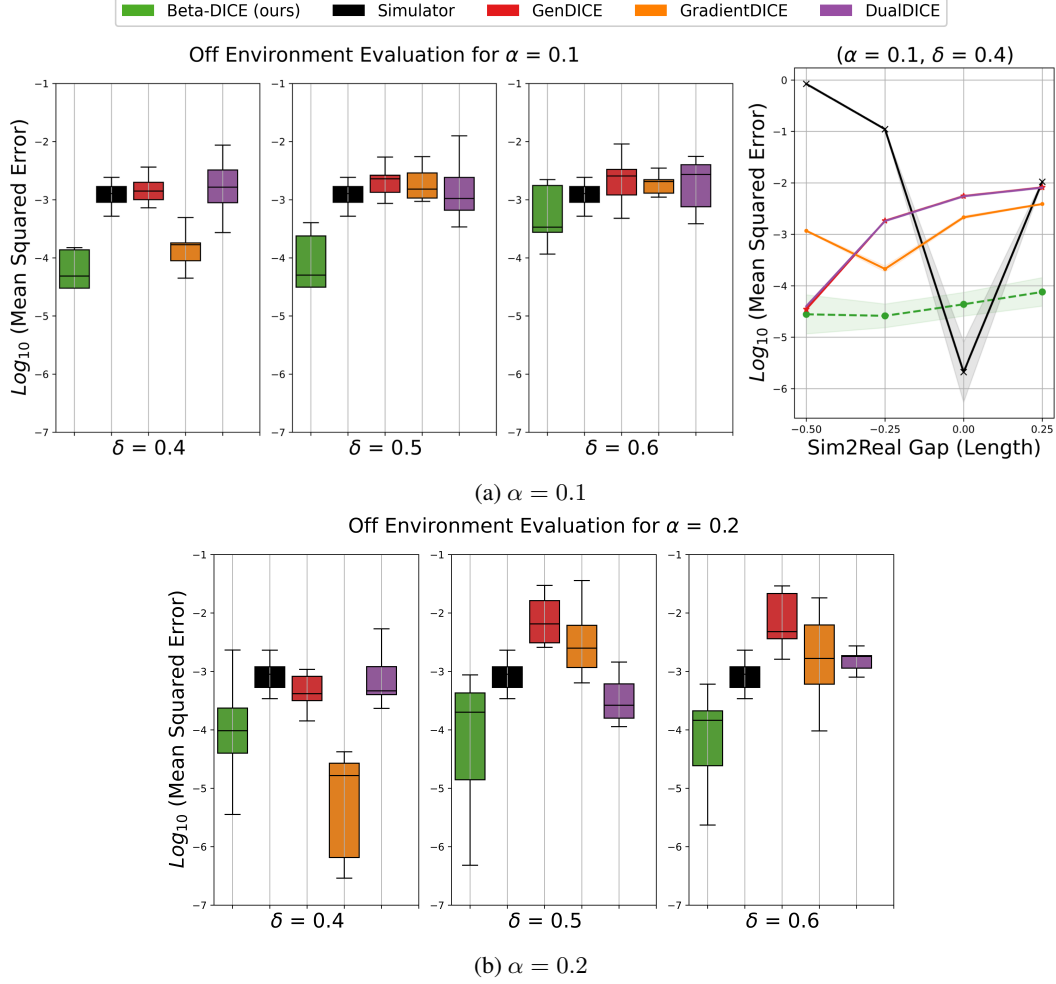

Figure 5: Each of the above figure demonstrates the effect of evaluation over varying behavior policies  $\delta = \{0.4, 0.5, 0.6\}$  on a fixed target policy using  $\beta$ -DICE for the reacher environment. For these set of experiments the training environment has length  $= 0.1m$ , while the test environment has length  $= 0.075m$ . In (a), (b) the target policies that we use are  $\alpha = \{0.1, 0.2\}$ . Additionally for (a), (RHS) we also show the effect of varying sim2real gap on target policy evaluation using  $\beta$ -DICE (while keeping  $\delta, \alpha$  fixed).

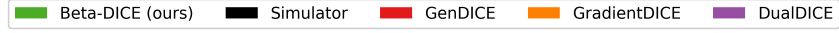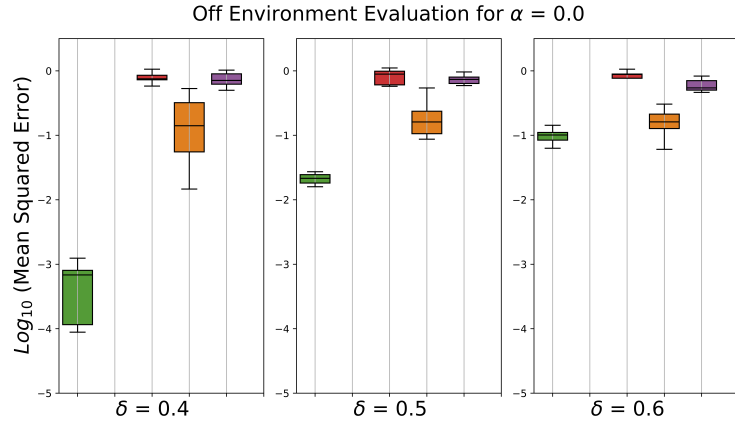

(a)  $\alpha = 0.0$

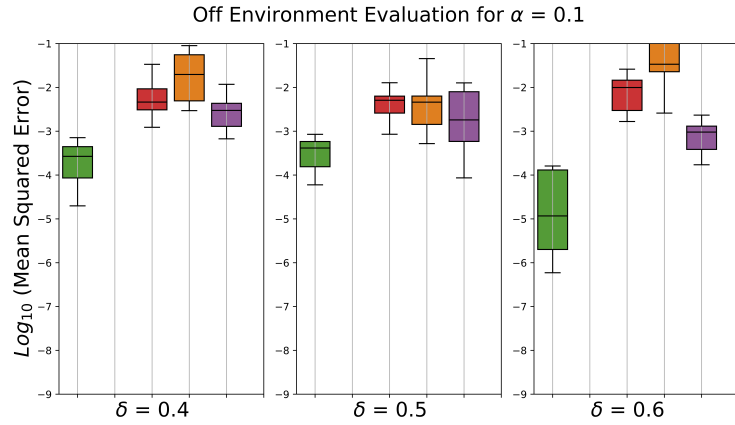

(b)  $\alpha = 0.1$

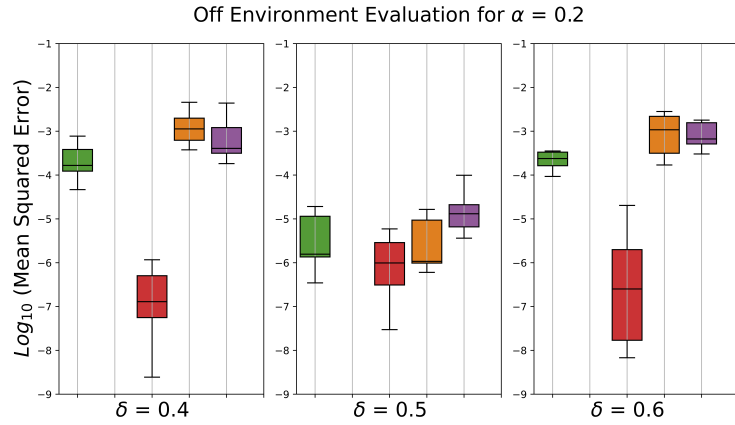

(c)  $\alpha = 0.2$

Figure 6: Each of the above figure demonstrates the effect of evaluation over varying behavior policies  $\delta = \{0.4, 0.5, 0.6\}$  on a fixed target policy using  $\beta$ -DICE for the half cheetah environment. For these set of experiments the training environment has length  $= 0.9Nm$ , while the test environment has length  $= 1.3Nm$ . In (a), (b), (c) the target policies that we use are  $\alpha = \{0.0, 0.1, 0.2\}$
